# Supplementary material for: Gold nanoparticles and reduced graphene oxide-amplified label-free DNA biosensor for dasatinib detection
Source: Royal Society of Chemistry journal article supplement (doi:10.1039/c8nj03783c), 2018-01-01
Supplement: c8nj03783c1.pdf [file c8nj03783c1.pdf]

### *Supporting information data*

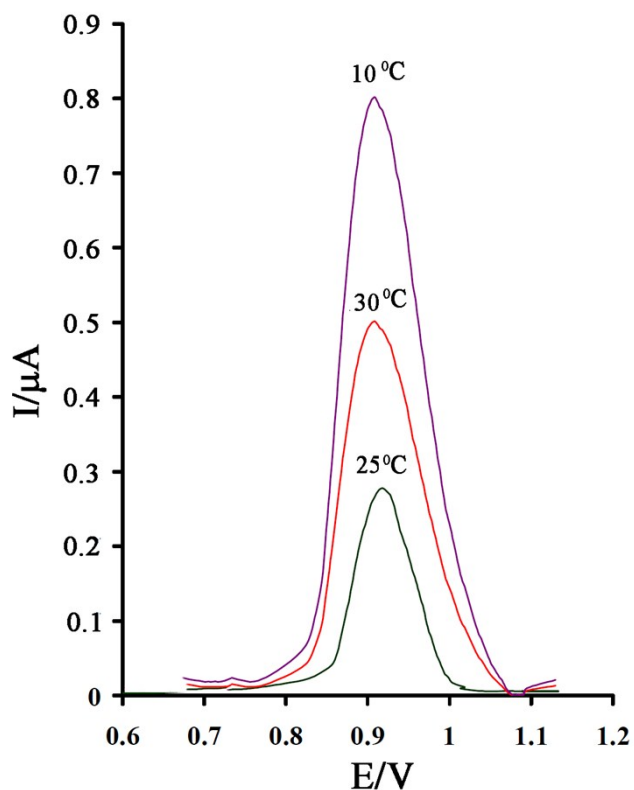

**Fig. S1:** Differential pulse voltammograms of GC/ds-DNA/rGO/Au-NPs in the presence of 3.75 μM dasatinib at different temperatures.

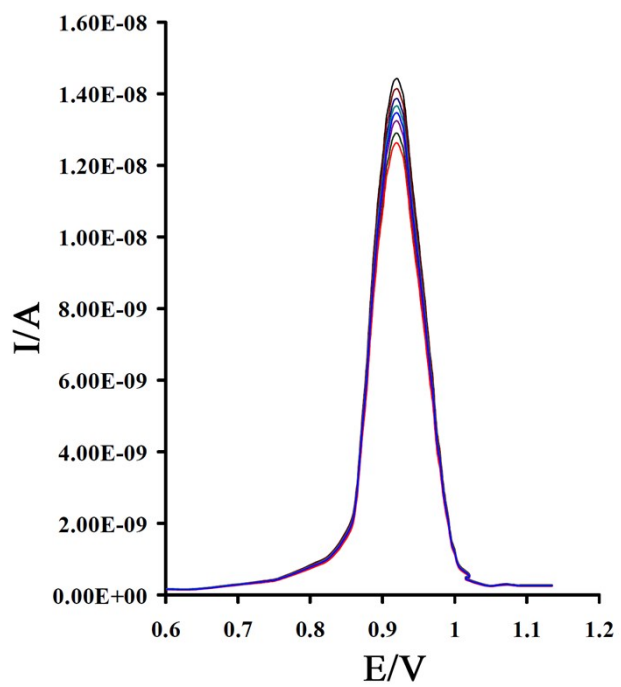

**Fig. S2.** A sample of differential pulse voltammograms of 0.03 dasatinib at a surface of sensor after some times recording in the same condition.

**Table S1;** The current of modified sensor before and after addition of interferences (relative to figure 7)

| Condition                  | Current before<br>addition of<br>interference | Current after addition<br>of interference | Error in current% |
|----------------------------|-----------------------------------------------|-------------------------------------------|-------------------|
| Dasatinib                  | 0.95±0.02                                     | 0.95±0.02                                 | ---               |
| Dasatinib+Ca <sup>2+</sup> | 0.95±0.02                                     | 0.9634                                    | 1.41              |
| Dasatinib+Na <sup>+</sup>  | 0.95±0.02                                     | 0.9589                                    | 0.93              |
| Dasatinib+F <sup>-</sup>   | 0.95±0.02                                     | 0.9834                                    | 3.51              |
| Dasatinib+ascorbic acid    | 0.95±0.02                                     | 0.9108                                    | 4.13              |
| Dasatinib+glucose          | 0.95±0.02                                     | 0.9039                                    | 4.85              |
| Dasatinib+phenylalanine    | 0.95±0.02                                     | 0.9311                                    | 1.99              |
